# Supplementary material for: Assessments of Vibrio parahaemolyticus and Vibrio vulnificus levels and microbial community compositions in blue crabs (Callinectes sapidus) and seawater harvested from the Maryland Coastal Bays
Source: Front Microbiol. 2023 Sep 28;14:1235070. doi: 10.3389/fmicb.2023.1235070 (PMC10581026; doi:10.3389/fmicb.2023.1235070)
Supplement: Supplementary file 3 [file Table_1.xlsx]

## Sheet: Vp for publication
Taxon name	Taxon rank	Taxonomy	LDA effect size	p-value	p-value (FDR)	Low Vibrio Crab tlh	Low Mid Vibrio Crab tlh
Bacilli	Class	Bacteria: Firmicutes	4.39686	0.04024	0.30386	0.76541	7.3215
Planctomycetia	Class	Bacteria: Planctomycetes	4.21709	0.00776	0.19329	0.38314	3.77106
Chroobacteria	Class	Bacteria: Cyanobacteria	3.95465	0.00679	0.19329	0.11446	2.05243
Bacteroidia	Class	Bacteria: Bacteroidetes	3.94935	0.04953	0.30386	2.05616	0.20859
Actinobacteria_c	Class	Bacteria: Actinobacteria	3.7097	0.01286	0.2067	0.16381	1.24873
Rhizobiales	Order	Bacteria: Proteobacteria: Alphaproteobacteria	4.54219	0.04953	0.30386	0.5326	7.62826
Planctomycetales	Order	Bacteria: Planctomycetes: Planctomycetia	4.21709	0.00776	0.19329	0.38314	3.77106
Bacillales	Order	Bacteria: Firmicutes: Bacilli	4.11185	0.03247	0.30386	0.43347	3.84673
Lactobacillales	Order	Bacteria: Firmicutes: Bacilli	4.0792	0.04024	0.30386	0.33194	3.47456
Chroococcales	Order	Bacteria: Cyanobacteria: Chroobacteria	3.95119	0.00679	0.19329	0.11307	2.0376
Marinilabiliales	Order	Bacteria: Bacteroidetes: Bacteroidia	3.91396	0.03994	0.30386	1.8207	0.09997
Frankiales	Order	Bacteria: Actinobacteria: Actinobacteria_c	3.63107	0.01002	0.19329	0.05751	0.9261
Entomoplasmatales	Order	Bacteria: Tenericutes: Mollicutes	3.05942	0.04783	0.30386	0.00892	0.21566
Planctomycetaceae	Family	Bacteria: Planctomycetes: Planctomycetia: Planctomycetales	4.21547	0.00776	0.19329	0.38314	3.75905
Prochlorococcaceae	Family	Bacteria: Cyanobacteria: Chroobacteria: Chroococcales	3.91644	0.00679	0.19329	0.10922	1.89838
AB021325_f	Family	Bacteria: Actinobacteria: Actinobacteria_c: Frankiales	3.62278	0.00776	0.19329	0.04679	0.8991
Staphylococcaceae	Family	Bacteria: Firmicutes: Bacilli: Bacillales	3.41868	0.04953	0.30386	0.04667	0.74189
Spiroplasmataceae	Family	Bacteria: Tenericutes: Mollicutes: Entomoplasmatales	3.0605	0.04783	0.30386	0.00892	0.21566
Prolixibacteraceae	Family	Bacteria: Bacteroidetes: Bacteroidia: Marinilabiliales	3.01107	0.03118	0.30386	0.20218	0.02679
GU293173_g	Genus	Bacteria: Tenericutes: Mollicutes: Bacilloplasma_o: Lumbricoplasmataceae	4.11626	0.01638	0.25023	0.3956	2.94064
PAC000036_g	Genus	Bacteria: Planctomycetes: Planctomycetia: Planctomycetales: Planctomycetaceae	4.06903	0.00345	0.19329	0.04635	2.36712
Prochlorococcus	Genus	Bacteria: Cyanobacteria: Chroobacteria: Chroococcales: Prochlorococcaceae	3.91644	0.00679	0.19329	0.10922	1.89838
AB021325_g	Genus	Bacteria: Actinobacteria: Actinobacteria_c: Frankiales: AB021325_f	3.62389	0.00776	0.19329	0.04343	0.89803
Spiroplasma	Genus	Bacteria: Tenericutes: Mollicutes: Entomoplasmatales: Spiroplasmataceae	3.05917	0.04783	0.30386	0.00892	0.21566
GU293173_s	Species	Bacteria: Tenericutes: Mollicutes: Bacilloplasma_o: Lumbricoplasmataceae: GU293173_g	4.11541	0.01638	0.25023	0.39519	2.93543
FJ545540_s	Species	Bacteria: Planctomycetes: Planctomycetia: Planctomycetales: Planctomycetaceae: PAC000036_g	3.85774	0.00396	0.19329	0.0335	1.43535
GQ866067_s	Species	Bacteria: Tenericutes: Mollicutes: Bacilloplasma_o: Lumbricoplasmataceae: GQ866067_g	3.84976	0.02603	0.30386	0.20757	1.64997
EF471577_s	Species	Bacteria: Actinobacteria: Actinobacteria_c: Frankiales: AB021325_f: AB021325_g	3.56631	0.00776	0.19329	0.02616	0.77164
EU804045_s	Species	Bacteria: Cyanobacteria: Chroobacteria: Chroococcales: Prochlorococcaceae: Prochlorococcus	3.3842	0.00396	0.19329	0.02363	0.54553
AACY020310490_s	Species	Bacteria: Planctomycetes: Planctomycetia: Planctomycetales: Planctomycetaceae: PAC000036_g	3.36652	0.00776	0.19329	0.00925	0.50211
HM057705_s	Species	Bacteria: Cyanobacteria: Chroobacteria: Chroococcales: Prochlorococcaceae: Prochlorococcus	3.34173	0.02319	0.30386	0.05163	0.57488
CH724158_s	Species	Bacteria: Cyanobacteria: Chroobacteria: Chroococcales: Prochlorococcaceae: Prochlorococcus	3.21576	0.00341	0.19329	0.00557	0.32543
DQ395499_g_uc	Species	Bacteria: Proteobacteria: Alphaproteobacteria: Rhizobiales: Hyphomicrobiaceae: DQ395499_g	3.09229	0.01972	0.29166	0	0.24763
Spiroplasma syrphidicola group	Species	Bacteria: Tenericutes: Mollicutes: Entomoplasmatales: Spiroplasmataceae: Spiroplasma	3.05924	0.04783	0.30386	0.00892	0.21566
AB355065_s	Species	Bacteria: Planctomycetes: Planctomycetia: Planctomycetales: Planctomycetaceae: PAC000036_g	3.04839	0.00682	0.19329	0	0.2086
Taxon name	Taxon rank	Taxonomy	LDA effect size	p-value	p-value (FDR)	Low Vibrio Crab tlh	High Mid Vibrio Crab tlh
Bacilli	Class	Bacteria: Firmicutes	4.98704	0.00548	0.48208	0.76541	19.9905
Planctomycetia	Class	Bacteria: Planctomycetes	3.95082	0.02325	0.48208	0.38314	2.32741
Actinobacteria_c	Class	Bacteria: Actinobacteria	3.54732	0.00225	0.44741	0.16381	0.88179
Bacillales	Order	Bacteria: Firmicutes: Bacilli	4.72989	0.00548	0.48208	0.43347	10.9639
Lactobacillales	Order	Bacteria: Firmicutes: Bacilli	4.63719	0.00548	0.48208	0.33194	9.02626
Planctomycetales	Order	Bacteria: Planctomycetes: Planctomycetia	3.95082	0.02325	0.48208	0.38314	2.32741
Pseudomonadales	Order	Bacteria: Proteobacteria: Gammaproteobacteria	3.90305	0.01243	0.48208	0.17214	1.87573
Frankiales	Order	Bacteria: Actinobacteria: Actinobacteria_c	3.42624	0.00726	0.48208	0.05751	0.59417
Thermales	Order	Bacteria: Deinococcus-Thermus: Deinococci	3.08171	0.03322	0.48208	0.04762	0.33228
Bacillaceae	Family	Bacteria: Firmicutes: Bacilli: Bacillales	4.53701	0.00953	0.48208	0.21963	6.92486
Staphylococcaceae	Family	Bacteria: Firmicutes: Bacilli: Bacillales	4.02287	0.0041	0.48208	0.04667	2.06594
Planctomycetaceae	Family	Bacteria: Planctomycetes: Planctomycetia: Planctomycetales	3.93271	0.03716	0.48208	0.38314	2.23699
Pseudomonadaceae	Family	Bacteria: Proteobacteria: Gammaproteobacteria: Pseudomonadales	3.70086	0.03322	0.48208	0.08166	1.08322
Listeriaceae	Family	Bacteria: Firmicutes: Bacilli: Bacillales	3.63376	0.04131	0.48208	0.00959	0.78167
Leuconostocaceae	Family	Bacteria: Firmicutes: Bacilli: Lactobacillales	3.58899	0.03322	0.48208	0.10728	1.00547
Enterococcaceae	Family	Bacteria: Firmicutes: Bacilli: Lactobacillales	3.55439	0.00305	0.48208	0.02768	0.69442
AB021325_f	Family	Bacteria: Actinobacteria: Actinobacteria_c: Frankiales	3.41927	0.00726	0.48208	0.04679	0.57521
Alcaligenaceae	Family	Bacteria: Proteobacteria: Betaproteobacteria: Burkholderiales	3.36616	0.01608	0.48208	0.04756	0.58166
Planococcaceae	Family	Bacteria: Firmicutes: Bacilli: Bacillales	3.33127	0.02064	0.48208	0.0589	0.56343
Ruminococcaceae	Family	Bacteria: Firmicutes: Clostridia: Clostridiales	3.12507	0.04167	0.48208	0.03356	0.34853
Thermaceae	Family	Bacteria: Deinococcus-Thermus: Deinococci: Thermales	3.08171	0.03322	0.48208	0.04762	0.33228
Bacillus	Genus	Bacteria: Firmicutes: Bacilli: Bacillales: Bacillaceae	4.52648	0.00953	0.48208	0.16478	6.68436
Staphylococcus	Genus	Bacteria: Firmicutes: Bacilli: Bacillales: Staphylococcaceae	4.02303	0.00305	0.48208	0.04159	2.06013
Escherichia	Genus	Bacteria: Proteobacteria: Gammaproteobacteria: Enterobacterales: Enterobacteriaceae	4.01012	0.02064	0.48208	0.0289	1.99974
Pseudomonas	Genus	Bacteria: Proteobacteria: Gammaproteobacteria: Pseudomonadales: Pseudomonadaceae	3.70902	0.01243	0.48208	0.05678	1.08209
PAC000036_g	Genus	Bacteria: Planctomycetes: Planctomycetia: Planctomycetales: Planctomycetaceae	3.70866	0.00629	0.48208	0.04635	1.13626
Listeria	Genus	Bacteria: Firmicutes: Bacilli: Bacillales: Listeriaceae	3.63365	0.04131	0.48208	0.00959	0.78151
Leuconostoc	Genus	Bacteria: Firmicutes: Bacilli: Lactobacillales: Leuconostocaceae	3.58891	0.03322	0.48208	0.10728	1.00531
Enterococcus	Genus	Bacteria: Firmicutes: Bacilli: Lactobacillales: Enterococcaceae	3.55037	0.00305	0.48208	0.02722	0.68786
Acinetobacter	Genus	Bacteria: Proteobacteria: Gammaproteobacteria: Pseudomonadales: Moraxellaceae	3.48299	0.04167	0.48208	0.07876	0.79101
AB021325_g	Genus	Bacteria: Actinobacteria: Actinobacteria_c: Frankiales: AB021325_f	3.42069	0.00726	0.48208	0.04343	0.57347
Lysinibacillus	Genus	Bacteria: Firmicutes: Bacilli: Bacillales: Planococcaceae	3.31819	0.04167	0.48208	0.05281	0.54061
Alcaligenaceae_uc	Genus	Bacteria: Proteobacteria: Betaproteobacteria: Burkholderiales: Alcaligenaceae	3.31245	0.02064	0.48208	0.04283	0.51295
Oceanospirillaceae_uc	Genus	Bacteria: Proteobacteria: Gammaproteobacteria: Oceanospirillales: Oceanospirillaceae	3.29196	0.03673	0.48208	0.33995	0.01302
Meiothermus	Genus	Bacteria: Deinococcus-Thermus: Deinococci: Thermales: Thermaceae	3.08193	0.04167	0.48208	0.04669	0.33169
Bacillus subtilis group	Species	Bacteria: Firmicutes: Bacilli: Bacillales: Bacillaceae: Bacillus	4.47475	0.01608	0.48208	0.08144	5.86395
GQ866067_s	Species	Bacteria: Tenericutes: Mollicutes: Bacilloplasma_o: Lumbricoplasmataceae: GQ866067_g	4.3988	0.04167	0.48208	0.20757	4.50536
Staphylococcus aureus group	Species	Bacteria: Firmicutes: Bacilli: Bacillales: Staphylococcaceae: Staphylococcus	4.01746	0.00548	0.48208	0.04024	2.03197
Escherichia coli group	Species	Bacteria: Proteobacteria: Gammaproteobacteria: Enterobacterales: Enterobacteriaceae: Escherichia	4.01026	0.01608	0.48208	0.02798	1.99967
Listeria monocytogenes group	Species	Bacteria: Firmicutes: Bacilli: Bacillales: Listeriaceae: Listeria	3.63342	0.04131	0.48208	0.00959	0.78131
Pseudomonas aeruginosa group	Species	Bacteria: Proteobacteria: Gammaproteobacteria: Pseudomonadales: Pseudomonadaceae: Pseudomonas	3.62991	0.01243	0.48208	0.01355	0.83885
Leuconostoc_uc	Species	Bacteria: Firmicutes: Bacilli: Lactobacillales: Leuconostocaceae: Leuconostoc	3.58901	0.03322	0.48208	0.10703	1.00524
Enterococcus_uc	Species	Bacteria: Firmicutes: Bacilli: Lactobacillales: Enterococcaceae: Enterococcus	3.5384	0.02064	0.48208	0.02321	0.66286
Bacillus cereus group	Species	Bacteria: Firmicutes: Bacilli: Bacillales: Bacillaceae: Bacillus	3.48848	0.04167	0.48208	0.05743	0.64287
Acinetobacter_uc	Species	Bacteria: Proteobacteria: Gammaproteobacteria: Pseudomonadales: Moraxellaceae: Acinetobacter	3.46409	0.04167	0.48208	0.07262	0.75392
FJ545540_s	Species	Bacteria: Planctomycetes: Planctomycetia: Planctomycetales: Planctomycetaceae: PAC000036_g	3.46373	0.02325	0.48208	0.0335	0.63796
EF471577_s	Species	Bacteria: Actinobacteria: Actinobacteria_c: Frankiales: AB021325_f: AB021325_g	3.3703	0.00548	0.48208	0.02616	0.50178
Lysinibacillus_uc	Species	Bacteria: Firmicutes: Bacilli: Bacillales: Planococcaceae: Lysinibacillus	3.30698	0.03322	0.48208	0.05031	0.52439
CH724158_s	Species	Bacteria: Cyanobacteria: Chroobacteria: Chroococcales: Prochlorococcaceae: Prochlorococcus	3.09628	0.03245	0.48208	0.00557	0.27272
Meiothermus silvanus	Species	Bacteria: Deinococcus-Thermus: Deinococci: Thermales: Thermaceae: Meiothermus	3.0847	0.04167	0.48208	0.04462	0.33141
PAC000683_g_uc	Species	Bacteria: Firmicutes: Clostridia: Clostridiales: Ruminococcaceae: PAC000683_g	3.02158	0.04131	0.48208	0.02026	0.26776
Taxon name	Taxon rank	Taxonomy	LDA effect size	p-value	p-value (FDR)	Low Vibrio Crab tlh	High Vibrio Crab tlh
Bacilli	Class	Bacteria: Firmicutes	4.94542	0.01359	0.32624	0.76541	18.1914
Chroobacteria	Class	Bacteria: Cyanobacteria	3.7939	0.02821	0.32624	0.11446	1.54169
Actinobacteria_c	Class	Bacteria: Actinobacteria	3.62067	0.00868	0.27087	0.16381	1.01715
Bacillales	Order	Bacteria: Firmicutes: Bacilli	4.68309	0.01359	0.32624	0.43347	9.85497
Lactobacillales	Order	Bacteria: Firmicutes: Bacilli	4.6019	0.02556	0.32624	0.33194	8.33628
Chroococcales	Order	Bacteria: Cyanobacteria: Chroobacteria	3.79135	0.04549	0.32624	0.11307	1.5314
Desulfobulbaceae_o	Order	Bacteria: Proteobacteria: Deltaproteobacteria	3.24026	0.04452	0.32624	0.46827	0.10943
Frankiales	Order	Bacteria: Actinobacteria: Actinobacteria_c	3.14521	0.02556	0.32624	0.05751	0.35196
Bacillaceae	Family	Bacteria: Firmicutes: Bacilli: Bacillales	4.47311	0.03788	0.32624	0.21963	6.06382
Lactobacillaceae	Family	Bacteria: Firmicutes: Bacilli: Lactobacillales	4.45808	0.04574	0.32624	0.08079	5.9102
Staphylococcaceae	Family	Bacteria: Firmicutes: Bacilli: Bacillales	3.97688	0.01359	0.32624	0.04667	1.89355
Prochlorococcaceae	Family	Bacteria: Cyanobacteria: Chroobacteria: Chroococcales	3.78185	0.04549	0.32624	0.10922	1.49819
Listeriaceae	Family	Bacteria: Firmicutes: Bacilli: Bacillales	3.61943	0.0108	0.30852	0.00959	0.78999
Enterococcaceae	Family	Bacteria: Firmicutes: Bacilli: Lactobacillales	3.58676	0.0033	0.25264	0.02768	0.78302
Desulfobulbaceae	Family	Bacteria: Proteobacteria: Deltaproteobacteria: Desulfobulbaceae_o	3.24026	0.04452	0.32624	0.46827	0.10943
AB021325_f	Family	Bacteria: Actinobacteria: Actinobacteria_c: Frankiales	3.12155	0.04549	0.32624	0.04679	0.32545
Peptoniphilaceae	Family	Bacteria: Firmicutes: Tissierellia: Tissierellales	3.03983	0.01359	0.32624	0.00741	0.21771
GU293173_g	Genus	Bacteria: Tenericutes: Mollicutes: Bacilloplasma_o: Lumbricoplasmataceae	4.8181	0.00424	0.25264	0.3956	13.0743
JN983627_g	Genus	Bacteria: Tenericutes: Mollicutes: Mycoplasmatales: Hepatoplasma_f	4.56433	0.02068	0.32624	0.17576	8.18779
Lactobacillus	Genus	Bacteria: Firmicutes: Bacilli: Lactobacillales: Lactobacillaceae	4.45811	0.04574	0.32624	0.08018	5.91007
Bacillus	Genus	Bacteria: Firmicutes: Bacilli: Bacillales: Bacillaceae	4.45737	0.0312	0.32624	0.16478	5.80637
Staphylococcus	Genus	Bacteria: Firmicutes: Bacilli: Bacillales: Staphylococcaceae	3.97403	0.01359	0.32624	0.04159	1.87649
Escherichia	Genus	Bacteria: Proteobacteria: Gammaproteobacteria: Enterobacterales: Enterobacteriaceae	3.93443	0.01089	0.30852	0.0289	1.73584
Prochlorococcus	Genus	Bacteria: Cyanobacteria: Chroobacteria: Chroococcales: Prochlorococcaceae	3.78185	0.04549	0.32624	0.10922	1.49819
Hepatoplasma_f_uc	Genus	Bacteria: Tenericutes: Mollicutes: Mycoplasmatales: Hepatoplasma_f	3.72812	0.03025	0.32624	0.0088	1.24018
PAC000036_g	Genus	Bacteria: Planctomycetes: Planctomycetia: Planctomycetales: Planctomycetaceae	3.65594	0.01089	0.30852	0.04635	1.0005
Listeria	Genus	Bacteria: Firmicutes: Bacilli: Bacillales: Listeriaceae	3.6194	0.0108	0.30852	0.00959	0.78999
Enterococcus	Genus	Bacteria: Firmicutes: Bacilli: Lactobacillales: Enterococcaceae	3.57371	0.01359	0.32624	0.02722	0.75933
Oceanospirillaceae_uc	Genus	Bacteria: Proteobacteria: Gammaproteobacteria: Oceanospirillales: Oceanospirillaceae	3.13522	0.0397	0.32624	0.33995	0.10648
AB021325_g	Genus	Bacteria: Actinobacteria: Actinobacteria_c: Frankiales: AB021325_f	3.12532	0.03766	0.32624	0.04343	0.32459
GU293173_s	Species	Bacteria: Tenericutes: Mollicutes: Bacilloplasma_o: Lumbricoplasmataceae: GU293173_g	4.81677	0.00424	0.25264	0.39519	13.035
JN983627_g_uc	Species	Bacteria: Tenericutes: Mollicutes: Mycoplasmatales: Hepatoplasma_f: JN983627_g	4.56432	0.02068	0.32624	0.17576	8.1876
Lactobacillus fermentum	Species	Bacteria: Firmicutes: Bacilli: Lactobacillales: Lactobacillaceae: Lactobacillus	4.45622	0.04574	0.32624	0.07732	5.88123
Bacillus subtilis group	Species	Bacteria: Firmicutes: Bacilli: Bacillales: Bacillaceae: Bacillus	4.39076	0.0312	0.32624	0.08144	4.99463
GQ866067_s	Species	Bacteria: Tenericutes: Mollicutes: Bacilloplasma_o: Lumbricoplasmataceae: GQ866067_g	4.23176	0.01687	0.32624	0.20757	3.50937
Staphylococcus aureus group	Species	Bacteria: Firmicutes: Bacilli: Bacillales: Staphylococcaceae: Staphylococcus	3.9634	0.01359	0.32624	0.04024	1.82846
Escherichia coli group	Species	Bacteria: Proteobacteria: Gammaproteobacteria: Enterobacterales: Enterobacteriaceae: Escherichia	3.93463	0.01089	0.30852	0.02798	1.73554
Listeria monocytogenes group	Species	Bacteria: Firmicutes: Bacilli: Bacillales: Listeriaceae: Listeria	3.61927	0.0108	0.30852	0.00959	0.78977
Pseudomonas aeruginosa group	Species	Bacteria: Proteobacteria: Gammaproteobacteria: Pseudomonadales: Pseudomonadaceae: Pseudomonas	3.58387	0.01687	0.32624	0.01355	0.77665
Enterococcus_uc	Species	Bacteria: Firmicutes: Bacilli: Lactobacillales: Enterococcaceae: Enterococcus	3.55419	0.02082	0.32624	0.02321	0.72131
FJ545540_s	Species	Bacteria: Planctomycetes: Planctomycetia: Planctomycetales: Planctomycetaceae: PAC000036_g	3.50605	0.01215	0.32624	0.0335	0.70913
Bacillus horneckiae	Species	Bacteria: Firmicutes: Bacilli: Bacillales: Bacillaceae: Bacillus	3.15534	0.04567	0.32624	0.00326	0.22869
EF471577_s	Species	Bacteria: Actinobacteria: Actinobacteria_c: Frankiales: AB021325_f: AB021325_g	3.08132	0.03766	0.32624	0.02616	0.27922
